# Supplementary material for: A three long non-coding RNA signature to improve survival prediction in patients with Wilms' tumor
Source: PubMed Central journal article supplement — Oncol Lett. 2019 Oct 14;18(6):6164–70. doi: 10.3892/ol.2019.10990 (PMC6865675; doi:10.3892/ol.2019.10990), 2019-10-14

Figure S1. Kaplan-Meier estimates of the survival outcomes for patients using the three-long non-coding RNA signature. ROC, receiver operating characteristic.

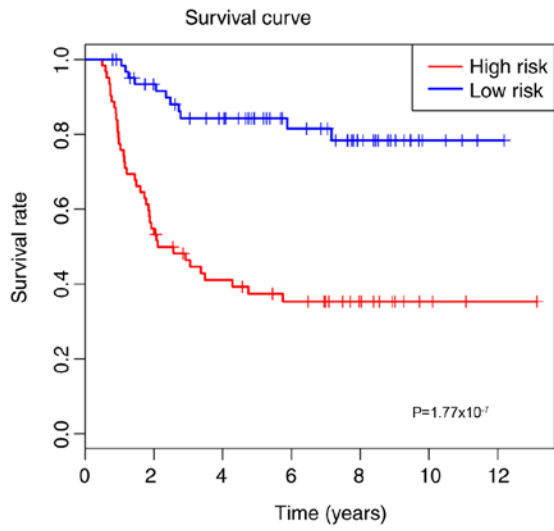

Figure S2. Receiver operating characteristic analysis of risk factors for survival prediction. AUC, area under the curve.

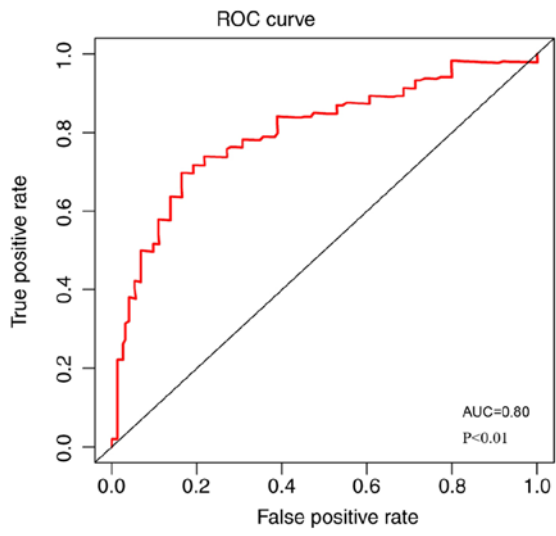

Supplement: Supplementary_Data.pdf [file Supplementary_Data.pdf]
